# Supplementary material
Source: publisher site journal article supplement (https://www.dovepress.com/get_supplementary_file.php?f=403448.docx)
Supplement: Supplementary file 1 [file get_supplementary_file.php]

**SUPPLEMENTARY MATERIAL**

**Supplemental Table 1.** PCR primers

|  | Gene | Example Variants | Primers | Sequence (5’ to 3’) | Amplicon Size (bp) | Source |
| --- | --- | --- | --- | --- | --- | --- |
| Carbapenemases | *bla*KPC | KPC-2  KPC-3 | KPC-F | CGTCTAGTTCTGCTGTCTTG | 798 | Poirel  et al. 2011 |
| KPC-R | CTTGTCATCCTTGTTAGGCG |
| *bla*OXA-48 | OXA-48 | OXA-F | GCGTGGTTAAGGATGAACAC | 438 |
| OXA-R | CATCAAGTTCAACCCAACCG |
| *bla*NDM | NDM-1 | NDM-F | GGTTTGGCGATCTGGTTTTC | 621 |
| NDM-R | CGGAATGGCTCATCACGATC |
| ESBLs | *bla*TEM | TEM-1  TEM-2 | MultiTSO-T_for | CATTTCCGTGTCGCCCTTATTC | 800 | Dallenne et al. 2010 |
| Multi-TSO-T_rev | CGTTCATCCATAGTTGCCTGAC |
| *bla*SHV | SHV-1 | MultiTSO-S_for | AGCCGCTTGAGCAAATTAAAC | 713 |
| Multi-TSO-S_rev | ATCCCGCAGATAAATCACCAC |
| *bla*OXA-1-like | OXA-1  OXA-4  OXA-30 | MultiTSO-O_for | GGCACCAGATTCAACTTTCAAG | 564 |
| Multi-TSO-O_rev | GACCCCAAGTTTCCTGTAAGTG |
| *bla*CTX-M-1-like | CTX-M-1  CTX-M-3  CTX-M-15 | MultiCTXMGp1_for | TTAGGAA**R**TGTGCCGCTG**Y**Aa | 688 |
| MultiCTXMGp1_rev | CGATATCGTTGGTGGT**R**CCATa |
| GyrA | *gyrA* | ST307 Global  ST307 Texas | gyrA-A | CGCGTACTATACGCCATGAACGTA | 441 | Brisse et al. 1999 |
| gyrA-C | ACCGTTGATCACTTCGGTCAGG |

aY = T or C, R = A or G

**Supplemental Table 2.** CRE isolate clinical data.

|  | **Species** | **Isolate ID** | **Age** | **Gender** | **Date of Collection** | **Source** | **Acquisition of Isolate** | **Treatment(s) (R/S)** | **Patient History** | **Outcome** |
| --- | --- | --- | --- | --- | --- | --- | --- | --- | --- | --- |
| CP | *Escherichia coli* | MDR_006 | 72 | M | 5/28/19 | gallbladder |  | cefazolin (R)  ceftazidime/avibactam |  | Alive |
| MDR_011 | 40 | M | 2/28/19 | sputum | hospital | vancomycin/cefepime (R) | Presumed to be colonized | Alive |
| MDR_018 | 76 | F | 6/20/19 | gallbladder | community | piperacillin-tazobactam (R) | Had a cholecystectomy; visitor from the Philippines | Alive |
| MDR_019 | 41 | F | 12/13/18 | blood | LTAC/hospital |  |  |  |
| *Klebsiella pneumoniae* | MDR_008 | 78 | F | 7/3/19 | wound | LTAC/hospital |  |  |  |
| MDR_009 | 36 | F | 4/21/19 | urine | hospital | meropenem (R)  ceftazidime/avibactam | Previous ESBL | Alive |
| MDR_010 | 58 | F | 7/17/19 | blood | LTAC/hospital |  |  |  |
| MDR_020 | 72 | M | 11/13/19 | urine | LTAC/hospital |  |  |  |
| MDR_080 |  | F | 10/13/19 | urine | LTAC/hospital |  |  |  |
| MDR_119 | 70 | M | 12/29/19 | urine | LTAC/hospital |  |  |  |
| MDR_103a | 58 | F | 12/2/19 | urine | LTAC/hospital |  |  |  |
| MDR_104a |
| non-CP | *Klebsiella pneumoniae* | MDR_007 | 68 | F | 9/11/19 | urine | community | meropenem (S) | Previous ESBL | Alive |
| MDR_017 | 25 | M | 9/24/19 | urine | hospital |  |  | Alive |
| MDR_049 | 57 | F | 11/30/19 | urine | LTAC/hospital |  |  |  |
| *Klebsiella aerogenes* | MDR_129 | 0.5 | M | 12/14/19 |  | hospital |  | Outpatient culture but prior hospitalization | Deceased |

aIsolates were collected from the same patient

**Supplemental Table 3.** ESBL-producing isolate resistance to the potential carbapenem-alternative antibiotics gentamicin (Gen), ciprofloxacin (Cip), nitrofurantoin (Nft), and trimethoprim-sulfamethoxazole (Tmp-Smx). The data reported here represent the number of resistant/intermediate susceptibility isolates per species per antibiotic. Percentage of the total isolates (92 *E. coli* isolates and 19 *K. pneumoniae* isolates) is also reported in parentheses.

|  | **Gen** | **Cip** | **Nft** | **Tmp-Smx** |
| --- | --- | --- | --- | --- |
| E. coli | 35 (38) | 61 (66) | 9 (10) | 51 (55) |
| K. pneumoniae | 15 (79) | 14 (74) | 14 (74) | 17 (89) |

**Supplemental Table 4.** Presence of genes encoding beta-lactamase enzymes as determined by PCR of select isolates. Number of positive isolates out of the total number of isolates tested are shown per enzyme.

| **Species** | **Phenotype** | **Total Isolates** | **SHV** | **TEM** | **CTX-M-1-like** | **OXA-1-like** |
| --- | --- | --- | --- | --- | --- | --- |
| *Escherichia coli* | CRE | 4 | 0/4 | 4/4 | 0/4 | 3/4 |
| ESBL-producing | 92 | 0/19 | 6/19a | 19/26b | 4/19 |
| **All EC** | **96** | **0/23** | **11/23** | **19/30** | **7/23** |
| *Klebsiella pneumoniae* | CRE | 11 | 8/8 | 6/10 | 4/10 | 3/10 |
| ESBL-producing | 19 | 6/6 | 14/17 | 13/17 | 10/17 |
| **All KP** | **30** | **14/14** | **20/27** | **17/27** | **13/27** |
| *Klebsiella oxytoca* | ESBL-producing | 2 | 0/2 | 2/2 | 2/2 | 1/2 |
| *Klebsiella aerogenes* | CRE | 1 | 0/1 | 0/1 | 0/1 | 0/1 |
| *Proteus mirabilis* | ESBL-producing | 2 | 0/2 | 2/2 | 2/2 | 0/2 |
| *Proteus vulgaris* | ESBL-producing | 1 | 0/1 | 0/1 | 0/1 | 0/1 |
|  | **All Other** | **6** | **0/6** | **4/6** | **4/6** | **1/6** |
| **TOTAL** |  | **132** | **14/28** | **29/44** | **26/42** | **19/44** |

aThree isolates had faint bands; not included in positive count

bOne isolate had a faint band and one had an incorrect amplicon size; not included in positive count

**Supplemental Table 5.** Summary of WGS key findings for eight CRE isolates.

|  | **Isolate ID** | **MLST** | **Location of Contigs** | **Plasmid Replicons** | **Carbapenemase** | **TEM** | **CTX-M** | **OXA-1-like** | **SHV** | **Aminoglycoside (Plasmid)** | **Other AMR (Plasmid)** | **Omp Mutations** | **Colicin(s)** |
| --- | --- | --- | --- | --- | --- | --- | --- | --- | --- | --- | --- | --- | --- |
| **CP**  **Escherichia**  **coli** | 006 | 90 | Chromosome |  |  |  |  |  |  |  |  |  |  |
| Plasmid 1  (AMR) | IncFIA, IncFIB(AP001918), IncFII(pAMA1167-NDM-5) | KPC-2 | TEM-1 |  | OXA-1 |  | APH(3'')-Ib, APH(6)-Id, AAC(3)-IId, AAC(6')-Ib-cr6 | *mphA*, *sul2*, *tetB*, *drfA17*, *tetR* |  |  |
| Plasmid 2  (Colicin) | N/A |  |  |  |  |  |  |  |  | colicin E1  homolog |
| 019 | 940 | Chromosome |  | OXA-48 |  |  |  |  |  |  |  |  |
| Plasmid 1  (AMR) | IncFII |  | TEM-190 |  |  |  |  | *mphA* |  |  |
| Plasmid 2  (Phage) | IncFIB(H89-PhagePlasmid) |  |  |  |  |  |  |  |  |  |
| **CP**  **Klebsiella**  **pneumoniae** | 009 | 629 | Chromosome |  |  |  |  |  | SHV-11 |  |  |  |  |
| Plasmid 1  (AMR) | IncN | KPC-3 |  |  |  |  |  | *drfA14* |  |  |
| 119 | 15 | Chromosome |  |  |  |  |  | SHV-28 |  |  |  |  |
| Plasmid 1  (AMR) | IncFIB(pQil), IncFII(K) | KPC-2 |  |  |  |  |  |  | OmpK36 knockout |  |
| Plasmid 2  (Colicin) | ColRNAI |  |  |  |  |  |  |  |  | cloacin homolog |
| Plasmid 3  (Phage) | N/A |  |  |  |  |  |  |  |  |  |
| **non-CP**  **Klebsiella**  **pneumoniae** | 007 | 307 | Chromosome |  |  |  |  |  | SHV-28 |  |  |  |  |
| Plasmid 1  (AMR) | IncFIB(K), IncFII(K) |  | TEM-1 | CTX-M-15 | OXA-1 |  | APH(3'')-Ib, APH(6)-Id, AAC(3)-IIe, AAC(6')-Ib-cr6 | *sul2, dfrA14*, *tetA*, *QnrB1* |  |  |
| 017 | 307 | Chromosome |  |  |  |  |  | SHV-205 |  |  |  |  |
|  |  | Plasmid 1 (AMR) |  |  | TEM-1 | CTX-M-15 | OXA-1 |  | APH(3'')-Ib, APH(6)-Id, AAC(3)-IIe, AAC(6')-Ib-cr6 | *sul2, dfrA14*, *tetA*, *QnrB1* |  |  |
| 049 | 307 | Chromosome |  |  |  |  |  | SHV-28 |  |  | OmpK36 premature stop codon |  |
| Plasmid 1  (AMR) | IncFIB(K), IncFII(K) |  | TEM-1 | CTX-M-15 | OXA-1 |  | APH(3'')-Ib, APH(6)-Id, AAC(3)-IIe, AAC(6')-Ib-cr6 | *sul2*, *dfrA14*, *tetA* |  |  |
| **non-CP *Klebsiella aerogenes*** | 129 | 93 | Chromosome |  |  |  |  |  |  |  |  | OmpK36 mutations |  |
| Plasmid 1 (Colicin) | ColRNAI |  |  |  |  |  |  |  |  | cloacin homolog |
